# Supplementary material for: Cuprous oxide nanoparticles inhibit angiogenesis via down regulation of VEGFR2 expression
Source: Royal Society of Chemistry journal article supplement (doi:10.1039/c3nr04363k), 2013-12-19
Supplement: c3nr04363k.pdf [file c3nr04363k.pdf]

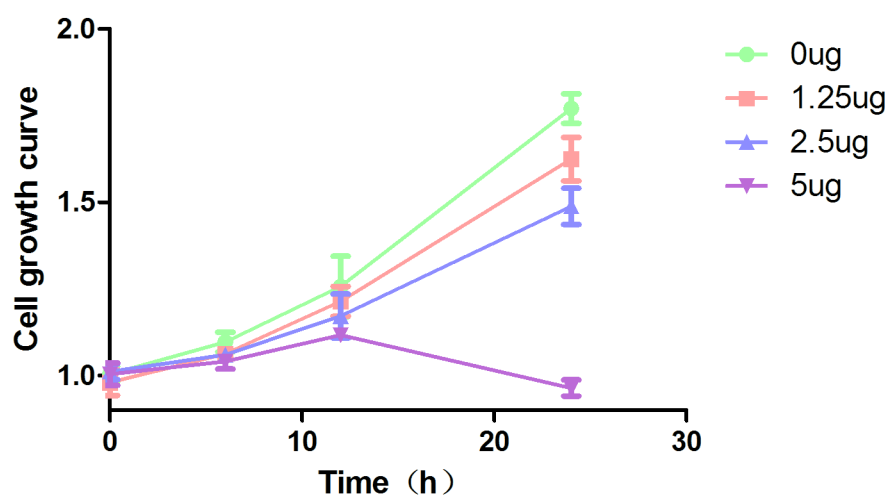

Cell growth curve of 0µg/ml, 1.25µg/ml, 2.5µg/ml and 5.0µg/ml CO-NPs treated HUVECs after 0h, 6h, 12h, and 24h incubation. Cell growth treated with various concentration of CO-NPs showed no significant differences at 0h, 6h and 12h. While, at 24h, CO-NPs were able to inhibit the growth of HUVECs remarkably in a dose dependent manner. What's more, the cells of control, 1.25ug and 2.5ug group increased 77.0%, 62.4% and 48.8% separately while the 5.0ug group decreased 4.6% at 24h compared with 0h. Altogether, the data suggest that CO-NPs were able to inhibit HUVECs growth significantly.
